# Supplementary material
Source: PubMed Central journal article supplement (PMC3747517)
Supplement: NIHMS420958-supplement-Movie_1_Legend.pdf [file NIHMS420958-supplement-Movie_1_Legend.pdf]

Movie 1 legend. Time-lapsed confocal images of a wild type embryo undergoing dorsal closure. The length bar is 50  $\mu\text{m}$ . Additional movies, including movies that show the end stages of dorsal closure (not shown here), are available from Hutson et al *Science* 300: 145-149 (2003).
